# Supplementary material for: Role of Yeast Mannoproteins in the Interaction between Salivary Proteins and Flavan-3-ols in a Cell-Based Model of the Oral Epithelium
Source: PubMed Central journal article supplement (PMC9585572; doi:10.1021/acs.jafc.1c08339), 2022-05-31

## Supporting Information

**Table SI-1.** Composition (%) of flavan-3-ols in grape seed extract determined by HPLC-DAD-MS.

|                  | <b>Non galloylated</b> | <b>Galloyl derivatives</b> |
|------------------|------------------------|----------------------------|
| <b>Monomers</b>  | 23.58                  | 1.43                       |
| <b>Dimers</b>    | 43.01                  | 3.86                       |
| <b>Trimers</b>   | 17.89                  | 1.85                       |
| <b>Tetramers</b> | 6.73                   | 0.97                       |
| <b>Pentamers</b> | 0.61                   | 0.06                       |
| <b>TOTAL</b>     | 91.82                  | 8.17                       |

**Figure S1.** Scheme representation in a 96-well plate of the interaction assays between flavan-3-ols (GSE), mannoproteins (MP) and oral epithelial cells in presence/absence of salivary proteins. Columns 1–6 correspond to the wells with PBS (no saliva) while columns 7–12 correspond to the wells where saliva was present. Lines A and H represent the control conditions without oral cells.

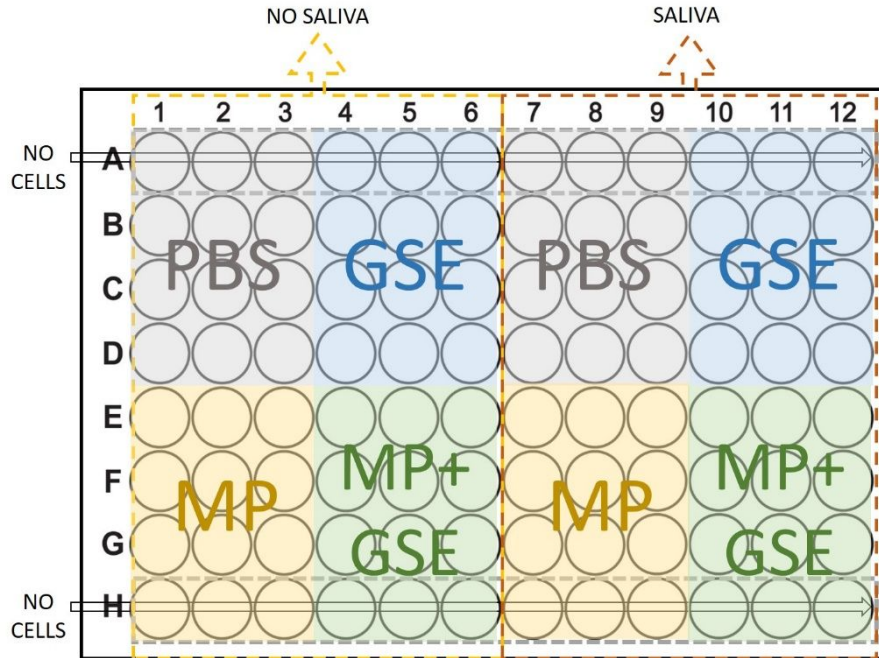

Supplement: jf1c08339_si_001.pdf [file jf1c08339_si_001.pdf]
